# Supplementary material for: A Single-blinded, Randomized Clinical Trial of How to Implement an Evidence-based Treatment for Generalized Anxiety Disorder [IMPLEMENT] — Effects of Three Different Strategies of Implementation
Source: PubMed Central journal article supplement — eBioMedicine. 2015 Nov 27;3:163–71. doi: 10.1016/j.ebiom.2015.11.049 (PMC4739431; doi:10.1016/j.ebiom.2015.11.049), 2015-11-27
Supplement: mmc1.pdf [file mmc1.pdf]

## GAD-Symptoms (Adherence-Priming)

|          | Individual manifestation of GAD and comorbide symptoms |                         | How to address within the MAW-manual? |                         | Was this area topic of the session? |          |          |          |          |
|----------|--------------------------------------------------------|-------------------------|---------------------------------------|-------------------------|-------------------------------------|----------|----------|----------|----------|
|          | Individual Symptoms                                    |                         | Within the sessions                   | Outside of the sessions | 1. sess.                            | 2. sess. | 3. sess. | 4. sess. | 5. sess. |
| <b>1</b> |                                                        |                         |                                       |                         |                                     |          |          |          |          |
| <b>2</b> |                                                        |                         |                                       |                         |                                     |          |          |          |          |
| <b>3</b> |                                                        |                         |                                       |                         |                                     |          |          |          |          |
| <b>4</b> |                                                        |                         |                                       |                         |                                     |          |          |          |          |
| <b>5</b> |                                                        |                         |                                       |                         |                                     |          |          |          |          |
|          | <b>S.Nr.</b>                                           | <b>Further symptoms</b> |                                       |                         |                                     |          |          |          |          |
|          |                                                        |                         |                                       |                         |                                     |          |          |          |          |
|          |                                                        |                         |                                       |                         |                                     |          |          |          |          |
|          |                                                        |                         |                                       |                         |                                     |          |          |          |          |
|          |                                                        |                         |                                       |                         |                                     |          |          |          |          |

**Was this area topic of the session?**

4 = very intense / 3 = intense / 2 = considerable / 1 = a little bit / 0 = not a topic

## Personal and interpersonal strengths (Resource-Priming)

|   | Manifestation of patients' individual strengths |                          | How to activate and customize within the MAW-manual? |                         | Was this area topic of the session? |          |          |          |          |
|---|-------------------------------------------------|--------------------------|------------------------------------------------------|-------------------------|-------------------------------------|----------|----------|----------|----------|
|   | Individual strengths                            |                          | Within the sessions                                  | Outside of the sessions | 1. sess.                            | 2. sess. | 3. sess. | 4. sess. | 5. sess. |
| 1 |                                                 |                          |                                                      |                         |                                     |          |          |          |          |
| 2 |                                                 |                          |                                                      |                         |                                     |          |          |          |          |
| 3 |                                                 |                          |                                                      |                         |                                     |          |          |          |          |
| 4 |                                                 |                          |                                                      |                         |                                     |          |          |          |          |
| 5 |                                                 |                          |                                                      |                         |                                     |          |          |          |          |
|   | <b>S.Nr.</b>                                    | <b>Further strengths</b> |                                                      |                         |                                     |          |          |          |          |
|   |                                                 |                          |                                                      |                         |                                     |          |          |          |          |
|   |                                                 |                          |                                                      |                         |                                     |          |          |          |          |
|   |                                                 |                          |                                                      |                         |                                     |          |          |          |          |
|   |                                                 |                          |                                                      |                         |                                     |          |          |          |          |

**Was this area topic of the session?**

4 = very intense / 3 = intense / 2 = considerable / 1 = a little bit / 0 = not a topic

*Appendix B. Zero-order correlations between the outcome measures and the composite measure*

| Fixed effects | <i>BAI</i> | <i>PSWQ</i> | <i>BDI</i> | <i>SCL-9</i> | <i>Outcome Composite</i> |
|---------------|------------|-------------|------------|--------------|--------------------------|
| BAI           |            |             |            |              | .81                      |
| PSWQ          | .54        |             |            |              | .78                      |
| BDI           | .65        | .55         |            |              | .88                      |
| SCL-9         | .66        | .60         | .74        |              | .87                      |
| RES           | -.47       | -.54        | -.64       | -.54         | .77                      |

For all correlations:  $p < .001$

*Appendix C. Growth models from intake to 6-months follow-up assessment split into the single outcome measures.*

|                                    | BAI               |                | PSWQ              |                | BDI-II            |                | GSI               |                | RES               |                | Composite         |                |
|------------------------------------|-------------------|----------------|-------------------|----------------|-------------------|----------------|-------------------|----------------|-------------------|----------------|-------------------|----------------|
|                                    | <i>Coeff (SE)</i> | <i>t-ratio</i> |
| Fixed effect                       |                   |                |                   |                |                   |                |                   |                |                   |                |                   |                |
| For intake                         |                   |                |                   |                |                   |                |                   |                |                   |                |                   |                |
| Base ( $\beta_{00}$ )              | 22.5 (2.8)        |                | 63.7 (1.5)        |                | 21.6 (2.3)        |                | 17.8 (1.3)        |                | 111.4 (7.1)       |                | 57.6 (2.0)        |                |
| Adherence priming ( $\beta_{01}$ ) | 0.9 (3.4)         | 0.3            | -0.2 (2.2)        | 0.1            | -4.7 (2.9)        | 1.6+           | -3.3 (2.2)        | 1.5+           | 4.5 (8.8)         | 0.5            | -2.3 (2.7)        | 0.9            |
| Resource priming ( $\beta_{02}$ )  | 1.4 (3.4)         | 0.4            | 1.7 (2.3)         | 0.8            | 0.7 (3.2)         | 0.1            | -1.5 (2.0)        | 0.7            | -3.1 (9.9)        | 0.3            | 0.4 (3.0)         | 0.1            |
| For linear growth                  |                   |                |                   |                |                   |                |                   |                |                   |                |                   |                |
| Base ( $\beta_{10}$ )              | -40.7 (7.5)       |                | -28.5 (5.4)       | 5.3 ***        | -26.3 (8.0)       | 3.3***         | -23.3 (6.4)       | 3.6***         | 93.5 (21.7)       | 4.2***         | -33.4 (6.9)       | 4.9***         |
| Adherence priming ( $\beta_{11}$ ) | 18.6 (10.3)       | 1.8*           | 14.1 (8.7)        | 1.6+           | 15.9 (11.0)       | 1.5+           | 21.0 (8.4)        | 2.5**          | -34.5 (25.7)      | 1.3+           | 19.9 (8.9)        | 2.2*           |
| Resource priming ( $\beta_{12}$ )  | 7.6 (11.8)        | 0.6            | 3.4 (9.2)         | 0.6            | -0.6 (10.7)       | 0.1            | 4.5 (8.4)         | 0.5            | -7.2 (30.1)       | 0.2            | 5.1 (10.2)        | 0.5            |
| For quadratic growth               |                   |                |                   |                |                   |                |                   |                |                   |                |                   |                |
| Base ( $\beta_{20}$ )              | 32.1 (7.2)        |                | 14.8 (5.1)        | 2.9**          | 15.0 (7.7)        | 2.0*           | 14.2 (5.7)        | 2.5*           | -69.9 (20.6)      | 3.4**          | 21.4 (6.7)        | 3.2**          |
| Adherence priming ( $\beta_{21}$ ) | -19.5 (9.7)       | 2.0*           | -10.8 (8.1)       | 1.3+           | -12.2 (10.2)      | 1.2            | -19.1 (7.7)       | 2.5**          | 22.5 (24.5)       | 0.9            | -17.0 (8.6)       | 2.2*           |
| Resource priming ( $\beta_{22}$ )  | -12.4 (11.6)      | 1.2            | -4.7 (8.1)        | 0.6            | -1.4 (9.8)        | 0.1            | -3.6 (7.4)        | 0.5            | 20.4 (28.6)       | 0.7            | -6.4 (9.0)        | 0.7            |
| Random effect                      |                   |                |                   |                |                   |                |                   |                |                   |                |                   |                |
| Level 2 intercept ( $r_{0j}$ )     | 74.5              |                | 20.4              |                | 47.3              |                | 18.5              |                | 597.0             |                | 45.5              |                |
| Level 2 linear slope ( $r_{1j}$ )  | 50.6              |                | 44.8              |                | 10.9              |                | 4.3               |                | 287.5             |                | 18.9              |                |
| Level 1 ( $e_{1j}$ )               | 30.0              |                | 30.8              |                | 39.5              |                | 20.9              |                | 268.6             |                | 28.5              |                |

*dfs for t-ratio = 54; 194*

+ p < 0.10

\* p < 0.05

\*\* p < 0.01

\*\*\* p < 0.001

*Appendix D. Multivariate Analysis of Variance: CTS-G observer ratings*

|                                | Between subjects |            | Within subjects |            | Sessions*Group |            |
|--------------------------------|------------------|------------|-----------------|------------|----------------|------------|
|                                | Group            |            | Sessions        |            |                |            |
|                                | <i>F (df)</i>    | $\eta_p^2$ | <i>F (df)</i>   | $\eta_p^2$ | <i>F (df)</i>  | $\eta_p^2$ |
| Multivariate                   | 21.0 (6/42)***   | 0.76       | 1.7 (9/198)+    | 0.07       | 1.3 (18/198)   | 0.10       |
| <i>Univariate</i>              |                  |            |                 |            |                |            |
| Resource activation            | 10.8 (2/22)***   | 0.50       | 0.4 (3/66)      | 0.02       | 0.6 (6/66)     | 0.05       |
| Session-structuring competence | 5.5 (2/22)*      | 0.33       | 2.7 (3/66)+     | 0.11       | 1.5 (6/66)     | 0.12       |
| General therapeutic competence | 7.6 (2/22)**     | 0.41       | 0.8 (3/66)      | 0.04       | 0.3 (6/66)     | 0.02       |

Pillai's Trace

+  $p < 0.10$

\*  $p < 0.05$

\*\*  $p < 0.01$

\*\*\*  $p < 0.001$
